# Supplementary material
Source: PubMed Central journal article supplement (PMC3454874)
Supplement: 07b4491349823efec8f160d895edc635_genetics.112.143503-3.pdf [file 07b4491349823efec8f160d895edc635_genetics.112.143503-3.pdf]

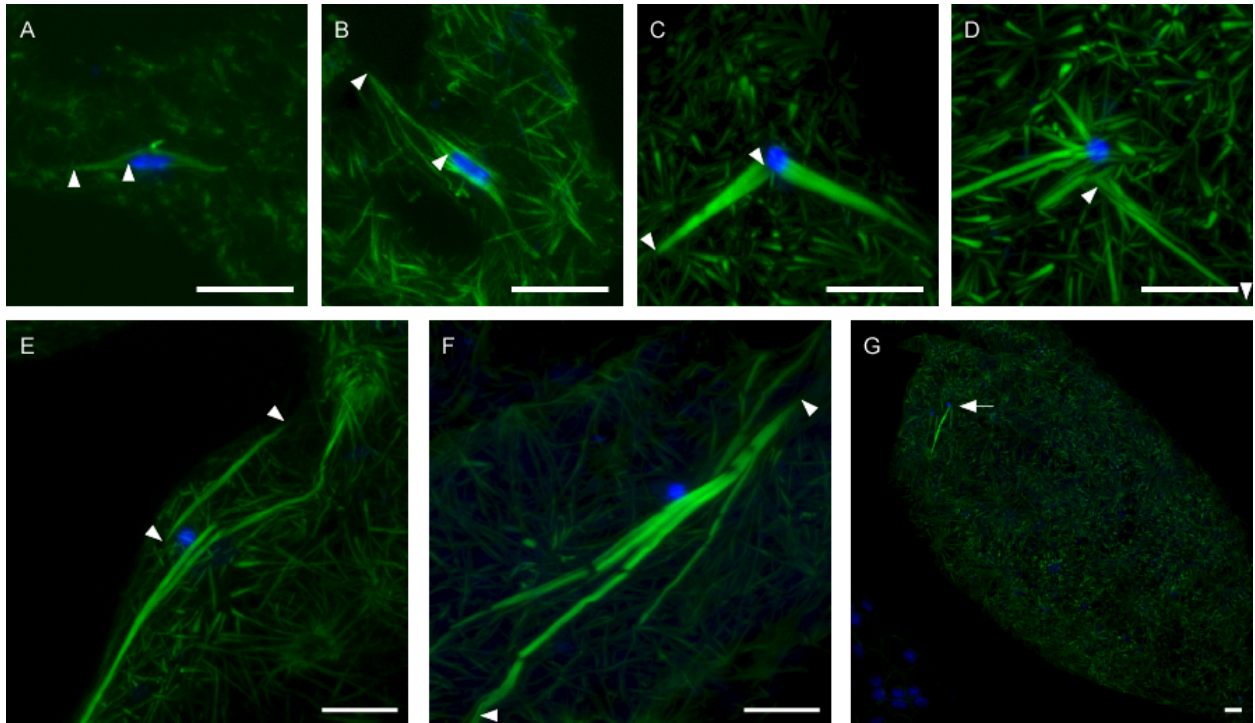

**Figure S2** Spindle length measurement in *Klp10A* germline mutants. Figure 4 is reproduced here with arrowheads indicating the microtubule bundles for which spindle length was measured in each panel. Spindle lengths between the arrow heads are 5.8 μm (A), 12.0 μm (B), 15.8 μm (C), 15.2 μm (D), 24.0 μm (E), and 60.0 μm (F). DNA is in blue and microtubules are in green. Scale bars are 10 μm.
